# Supplementary material for: Bio-oriented synthesis of ibuprofen derivatives for enhancement efficacy in post-operative and chronic inflammatory pain models
Source: Royal Society of Chemistry journal article supplement (doi:10.1039/d3ra01385e), 2023-01-01
Supplement: d3ra01385e1.pdf [file d3ra01385e1.pdf]

**Bio-oriented synthesis of novel ibuprofen derivatives for enhancement  
efficacy in post-operative and chronic inflammatory pain models**

Nisar Zamin Shah<sup>1</sup>, Satya Kumar Avula<sup>2</sup>, Nasiara Karim<sup>1,3\*</sup>, Nazar Ul Islam<sup>4</sup>, Gaber El-Saber Batiha<sup>5</sup>, Abdullatif Bin Muhsinah<sup>6</sup>, Ajmal Khan<sup>2\*</sup>, Ahmed Al-Harrasi<sup>2\*</sup>

<sup>1</sup>Department of Pharmacy, University of Malakand, Chakdara-18800, Khyber  
Pakhtunkhwa, Pakistan.

<sup>2</sup>Natural and Medical Sciences Research Center, University of Nizwa, P. O. Box-33,  
Postal Code-616, Birkat Al-Mauz, Nizwa, Oman.

<sup>3</sup>Department of Pharmacy, University of Peshawar 25120, Khyber Pakhtunkhwa, Pakistan.

<sup>4</sup>Department of Pharmacy, Sarhad University of Science and Information Technology,  
Peshawar, Pakistan

<sup>5</sup>Department of Pharmacology and Toxicology, College of Pharmacy, Umm Al-Qura  
University, Makkah 21955, Saudi Arabia

\*Correspondence: nasiara.karim@hotmail.com (N.K.); ajmalkhan@unizwa.edu.om (A.K.);

aharrasi@unizwa.edu.om (A.A-H.);

## Contents

Copies of  $^1\text{H}$ -NMR,  $^{13}\text{C}$ -NMR and HRMS spectra of compounds.

| <b>Table of Contents</b>                                                                           | <b>Page</b> |
|----------------------------------------------------------------------------------------------------|-------------|
| <b>Figure S1:</b> $^1\text{H}$ NMR spectrum (600 MHz, $\text{CDCl}_3$ ) of compound <b>NS1</b>     | 3           |
| <b>Figure S2:</b> $^{13}\text{C}$ NMR spectrum (150 MHz, $\text{CDCl}_3$ ) of compound <b>NS1</b>  | 3           |
| <b>Figure S3:</b> HRMS spectrum of compound <b>NS1</b>                                             | 4           |
| <b>Figure S4:</b> $^1\text{H}$ NMR spectrum (600 MHz, $\text{CDCl}_3$ ) of compound <b>NS2</b>     | 4           |
| <b>Figure S5:</b> $^{13}\text{C}$ NMR spectrum (150 MHz, $\text{CDCl}_3$ ) of compound <b>NS2</b>  | 5           |
| <b>Figure S6:</b> HRMS spectrum of compound <b>NS2</b>                                             | 5           |
| <b>Figure S7:</b> $^1\text{H}$ NMR spectrum (600 MHz, $\text{CDCl}_3$ ) of compound <b>NS3</b>     | 6           |
| <b>Figure S8:</b> $^{13}\text{C}$ NMR spectrum (150 MHz, $\text{CDCl}_3$ ) of compound <b>NS3</b>  | 6           |
| <b>Figure S9:</b> HRMS spectrum of compound <b>NS3</b>                                             | 7           |
| <b>Figure S10:</b> $^1\text{H}$ NMR spectrum (600 MHz, $\text{CDCl}_3$ ) of compound <b>NS4</b>    | 7           |
| <b>Figure S11:</b> $^{13}\text{C}$ NMR spectrum (150 MHz, $\text{CDCl}_3$ ) of compound <b>NS4</b> | 8           |
| <b>Figure S12:</b> HRMS spectrum of compound <b>NS4</b>                                            | 8           |

Dr. Ajmal / NS-1 / DMSO  
PROTON

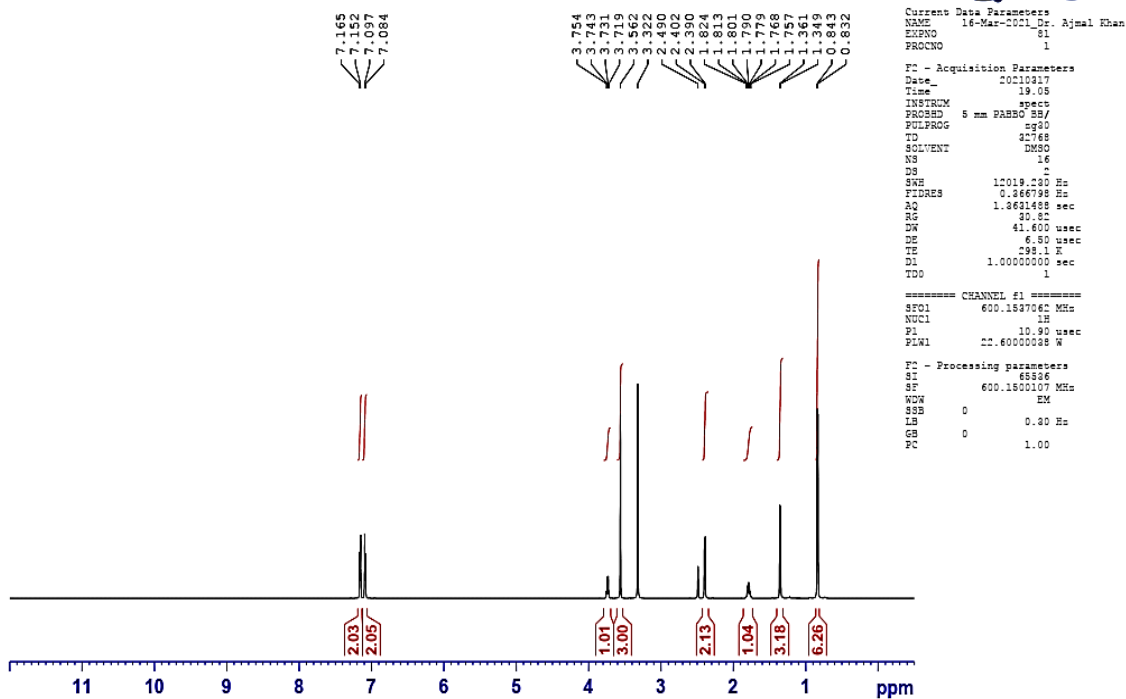

**Figure S1:**  $^1\text{H}$  NMR spectrum (600 MHz,  $\text{CDCl}_3$ ) of compound NS1

Dr. Ajmal / NS-1 / DMSO  
C13CPD

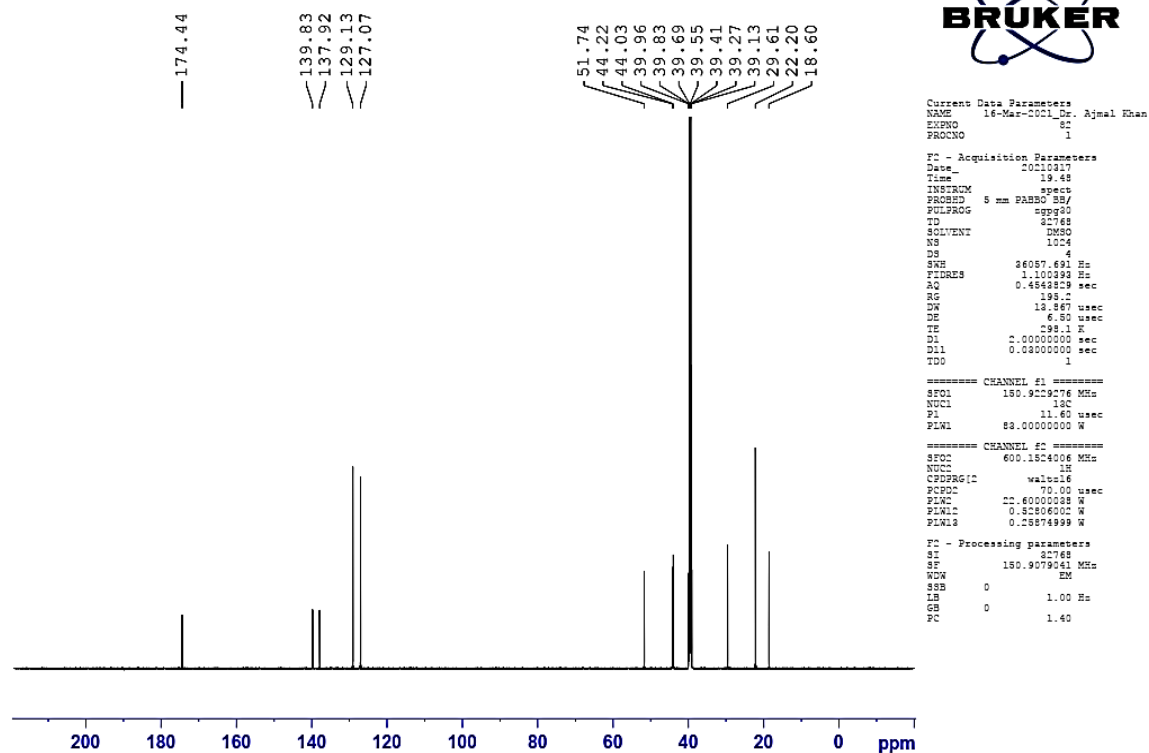

Figure S2:  $^{13}\text{C}$  NMR spectrum (150 MHz,  $\text{CDCl}_3$ ) of compound NS1

|             |                                   |                        |         |                 |                      |
|-------------|-----------------------------------|------------------------|---------|-----------------|----------------------|
| Sample Name | NS-1                              | Position               | Vial 1  | Instrument Name | Instrument 1         |
| User Name   |                                   | Inj Vol                | 5       | InjPosition     |                      |
| Sample Type | Sample                            | IRM Calibration Status | Success | Data Filename   | NS-1.d               |
| ACQ Method  | POSITIVE ION METHOD MS_FOR_DMSO.m | Comment                |         | Acquired Time   | 02-Feb-23 1:42:42 PM |

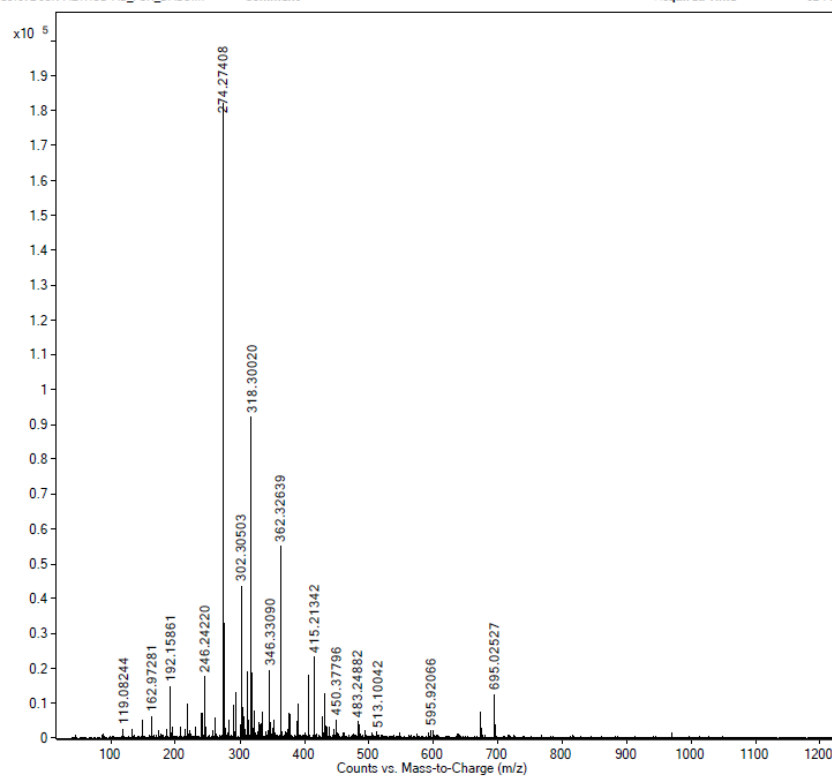

Figure S3: HRMS spectrum of compound NS1

Dr. Ajmal / NS-2 / DMSO  
PROTON

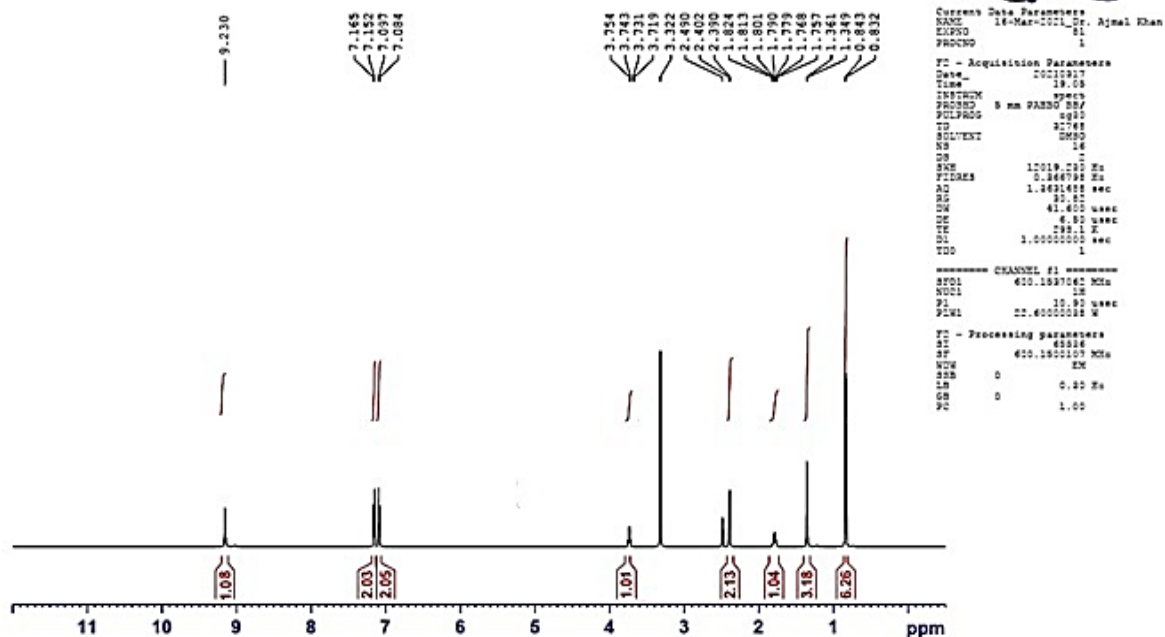

Figure S4:  $^1\text{H}$  NMR spectrum (600 MHz,  $\text{CDCl}_3$ ) of compound NS2

Dr. Ajmal / NS-2 / DMSO  
C13CPD

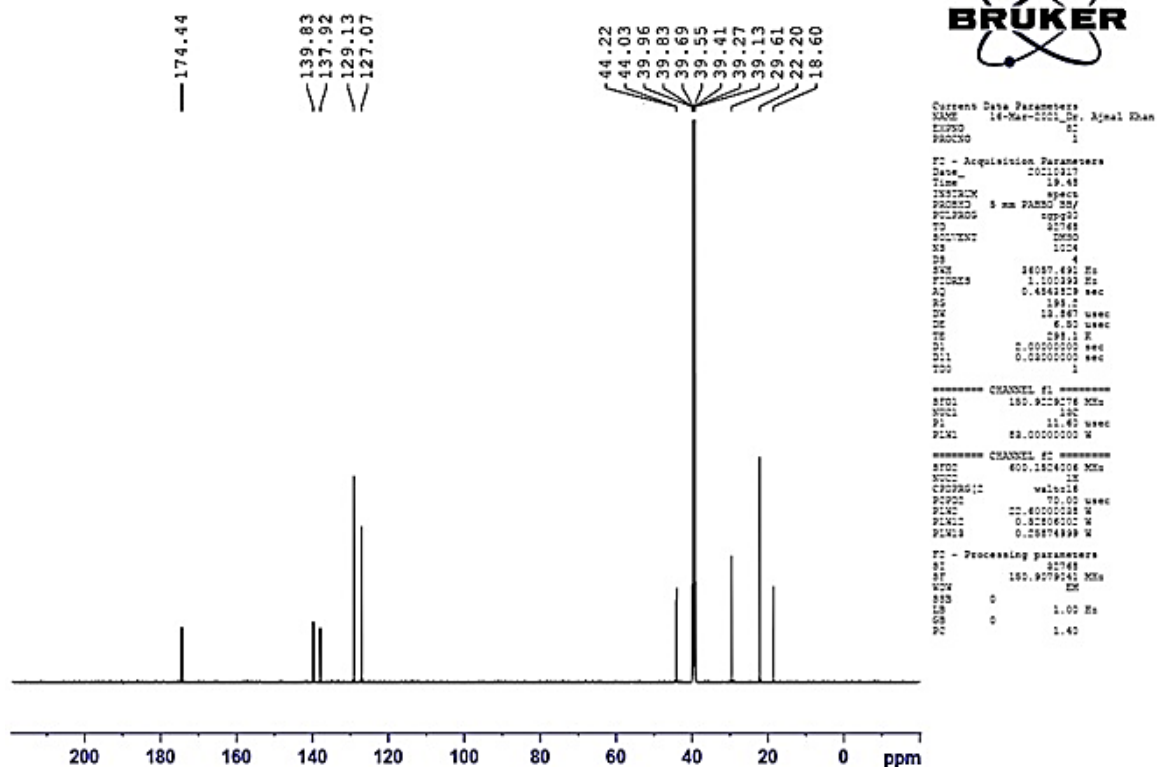

Figure S5:  $^{13}\text{C}$  NMR spectrum (150 MHz,  $\text{CDCl}_3$ ) of compound NS2

|             |                                   |                        |         |                 |                      |
|-------------|-----------------------------------|------------------------|---------|-----------------|----------------------|
| Sample Name | NS-2                              | Position               | Vial 2  | Instrument Name | Instrument 1         |
| User Name   |                                   | Inj Vol                | 5       | InjPosition     |                      |
| Sample Type | Sample                            | IRM Calibration Status | Success | Data Filename   | NS-2.d               |
| ACQ Method  | POSITIVE ION METHOD MS_FOR_DMSO.m | Comment                |         | Acquired Time   | 02-Feb-23 1:48:31 PM |

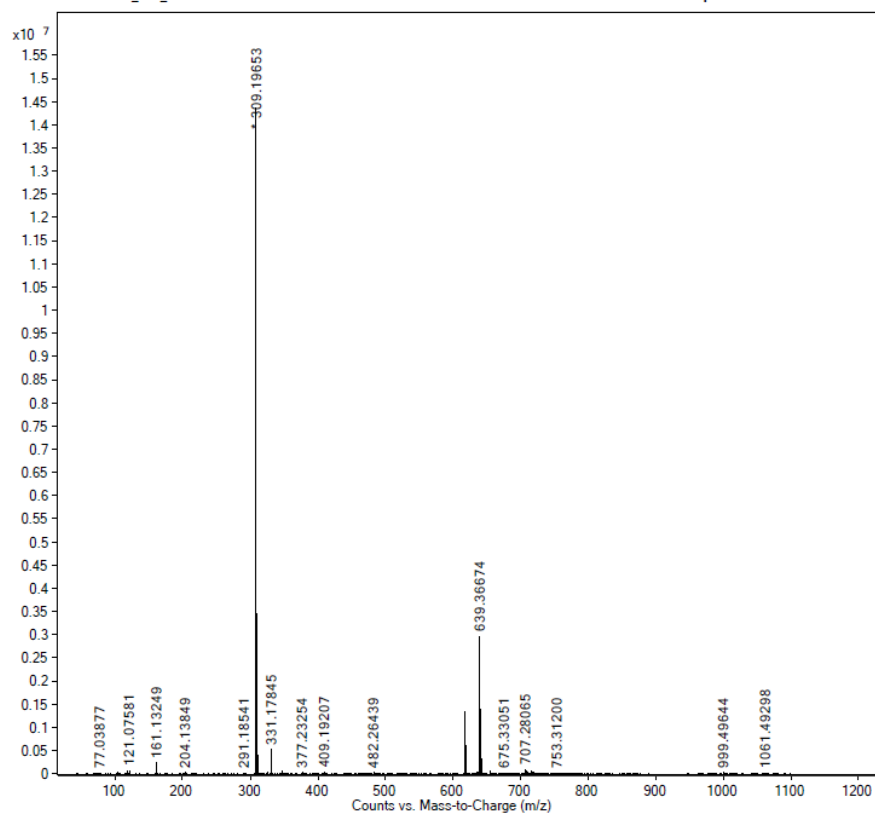

**Figure S6:** HRMS spectrum of compound NS2

Dr. Ajmal / NS-3 / DMSO  
PROTON

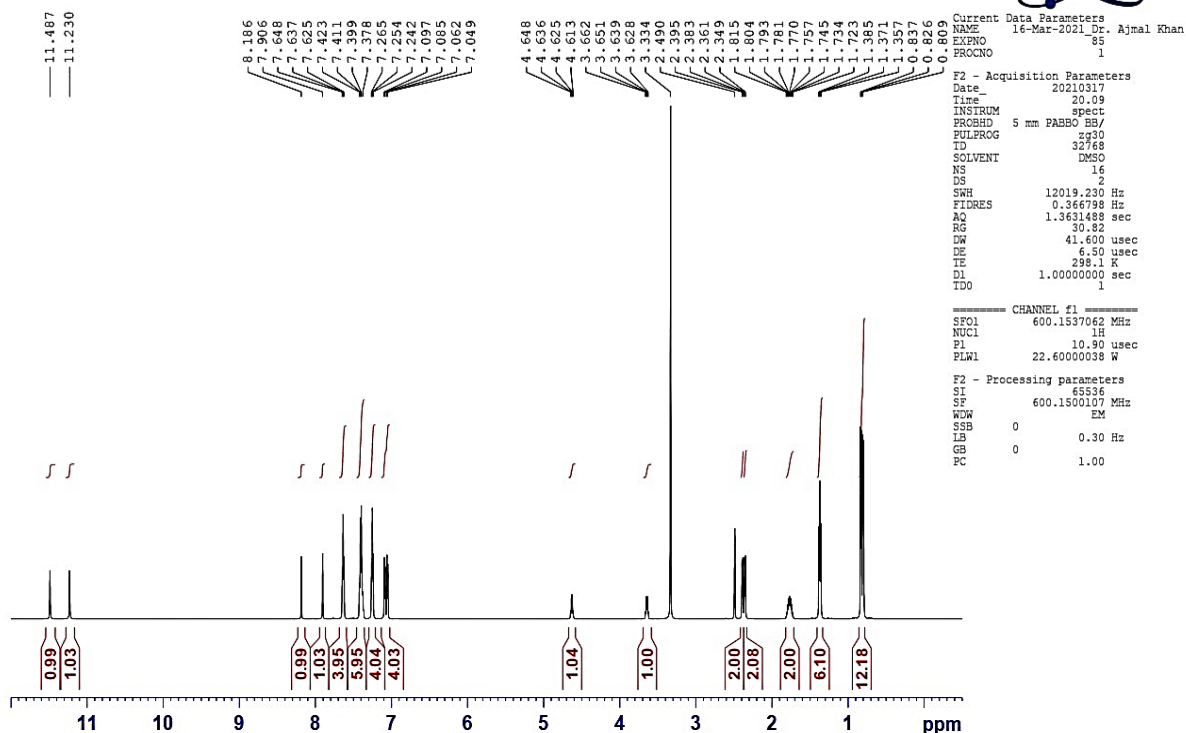

Figure S7:  $^1\text{H}$  NMR spectrum (600 MHz,  $\text{CDCl}_3$ ) of compound NS3

Dr. Ajmal / NS-3 / DMSO  
C13CPD

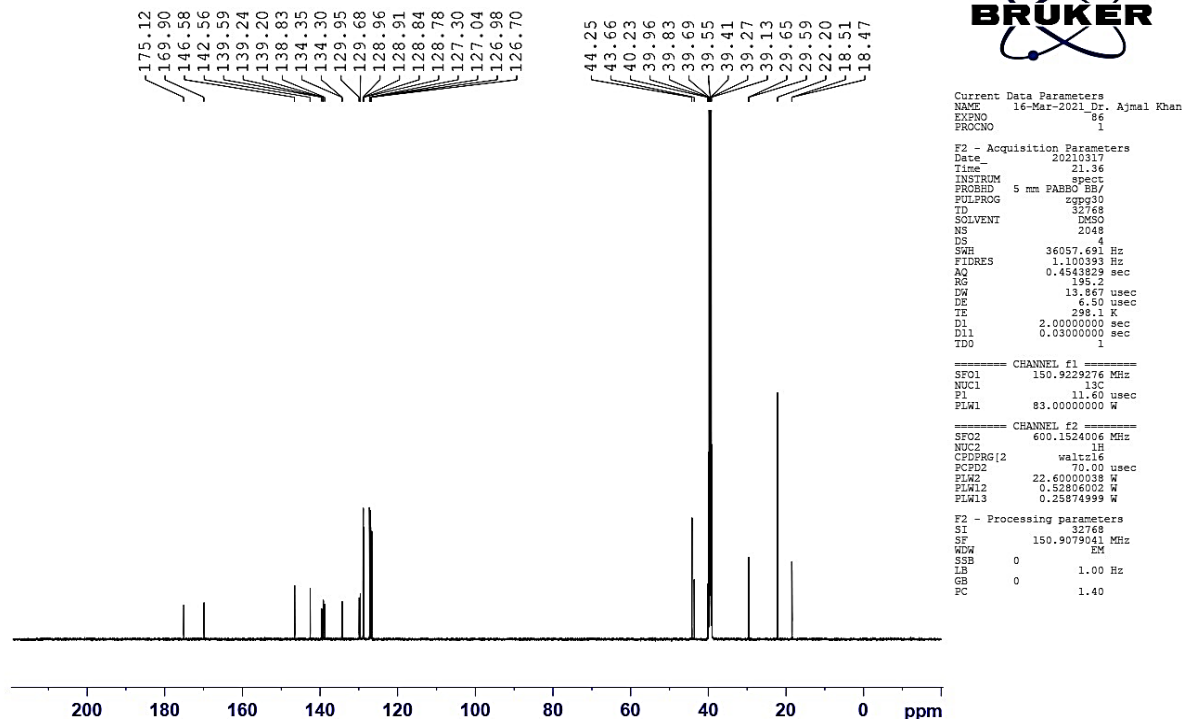

Figure S8:  $^{13}\text{C}$  NMR spectrum (150 MHz,  $\text{CDCl}_3$ ) of compound NS3

|             |                                   |                        |         |                 |                      |
|-------------|-----------------------------------|------------------------|---------|-----------------|----------------------|
| Sample Name | NS-3                              | Position               | Vial 3  | Instrument Name | Instrument 1         |
| User Name   |                                   | Inj Vol                | 5       | InjPosition     |                      |
| Sample Type | Sample                            | IRM Calibration Status | Success | Data Filename   | NS-3.d               |
| ACQ Method  | POSITIVE ION METHOD MS_FOR_DMSO.m | Comment                |         | Acquired Time   | 02-Feb-23 1:54:25 PM |

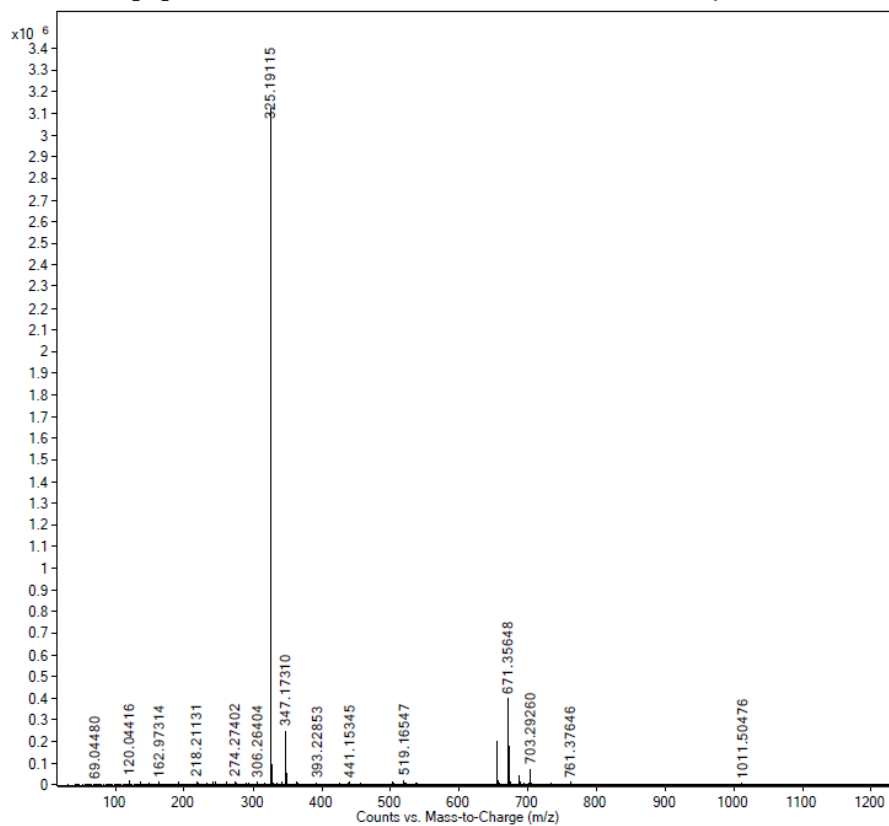

**Figure S9:** HRMS spectrum of compound NS3

Dr. Ajmal / NS-4 / DMSO  
PROTON

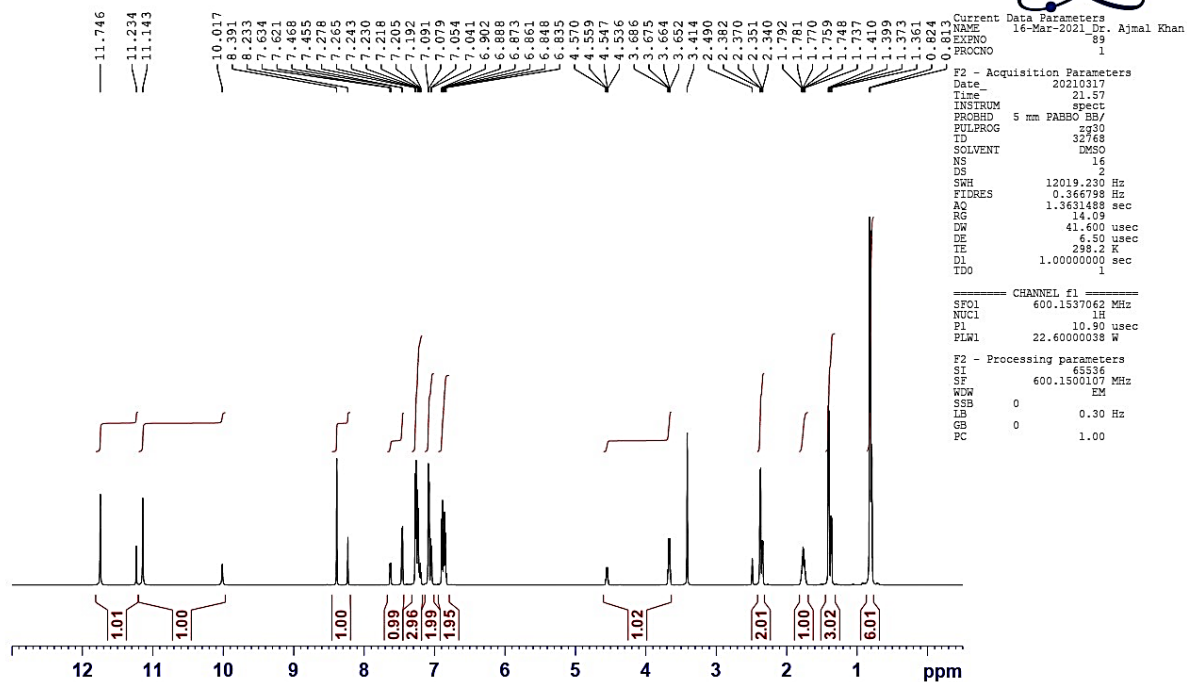

Figure S10:  $^1\text{H}$  NMR spectrum (600 MHz,  $\text{CDCl}_3$ ) of compound NS4

Dr. Ajmal / NS-4 / DMSO  
C13CPD

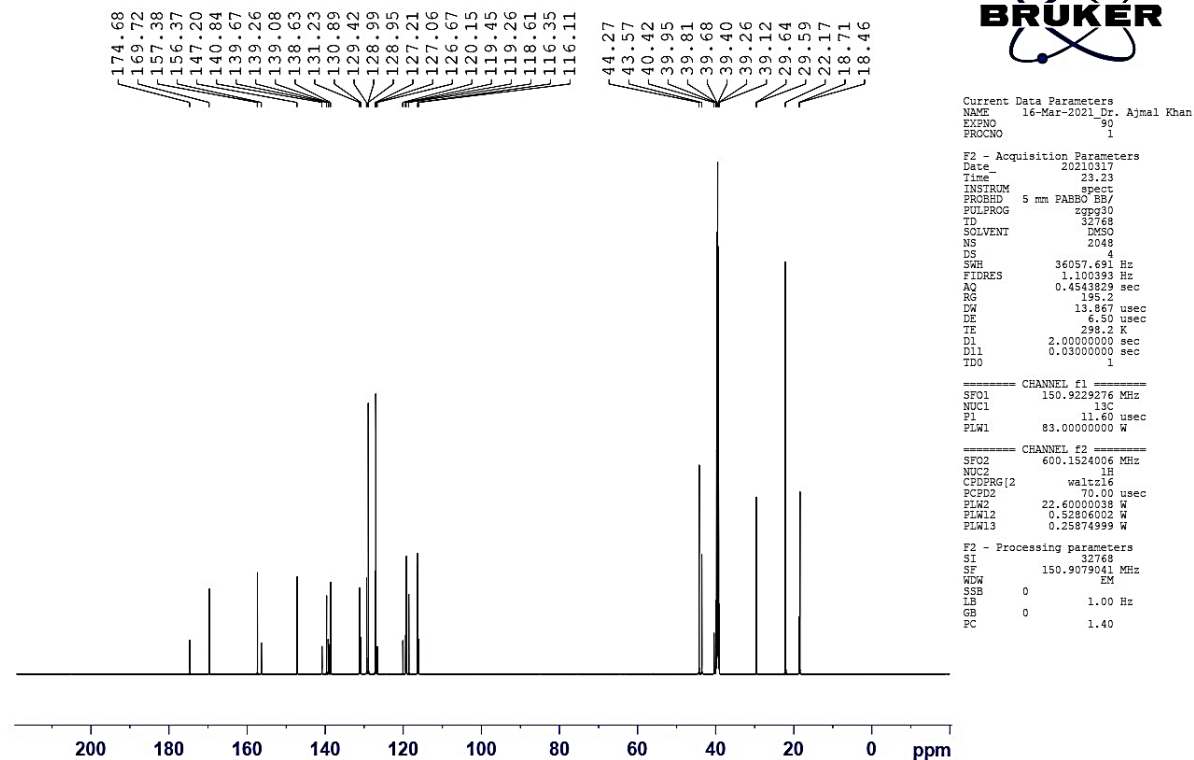

Figure S11:  $^{13}\text{C}$  NMR spectrum (150 MHz,  $\text{CDCl}_3$ ) of compound NS4

|             |                                   |                        |         |                 |                      |
|-------------|-----------------------------------|------------------------|---------|-----------------|----------------------|
| Sample Name | NS-4                              | Position               | Vial 4  | Instrument Name | Instrument 1         |
| User Name   |                                   | Inj Vol                | 5       | InjPosition     |                      |
| Sample Type | Sample                            | IRM Calibration Status | Success | Data Filename   | NS-4.d               |
| ACQ Method  | POSITIVE ION METHOD MS_FOR_DMSO.m | Comment                |         | Acquired Time   | 02-Feb-23 2:00:20 PM |

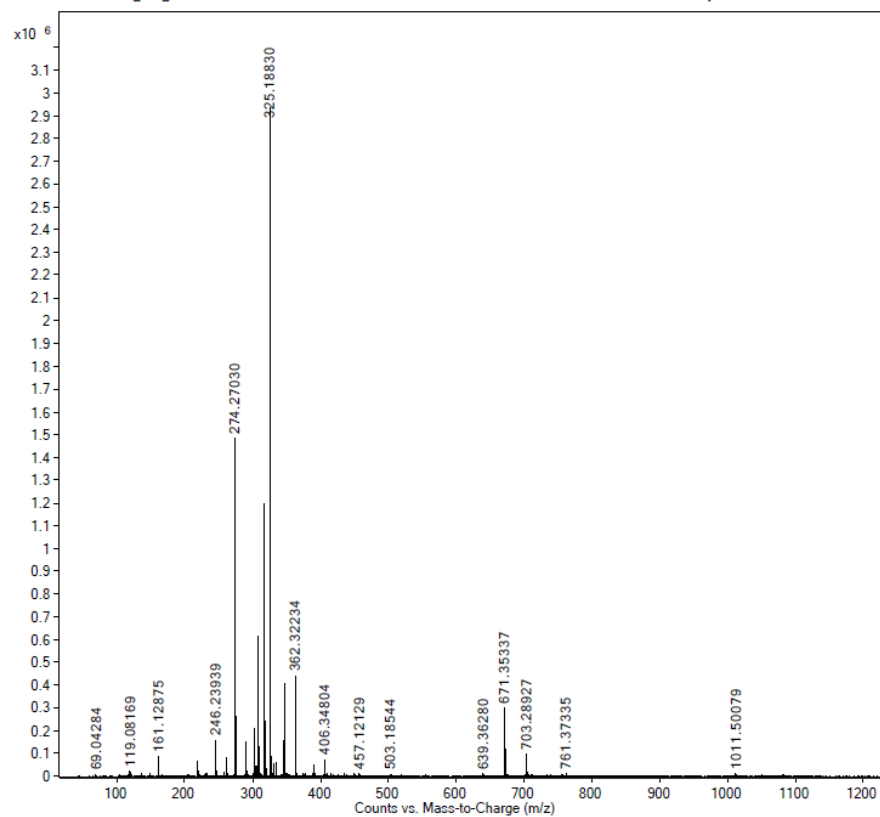

**Figure S12: HRMS spectrum of compound NS4**
